# Supplementary material for: Spontaneously Reported Adverse Drug Reactions and Their Description in Hospital Discharge Reports: A Retrospective Study
Source: MDPI journal article supplement (doi:10.3390/jcm10153293), 2021-07-26
Supplement: s1 [file s1]

## Supplementary material

**Table S1. Adverse drug reactions and involved drugs.**

| Adverse drug reactions (363)                                                    | Drugs involved (627; 209 different drugs)                                                                                                            |
|---------------------------------------------------------------------------------|------------------------------------------------------------------------------------------------------------------------------------------------------|
| <b>Nervous system disorders (63). Drugs involved (116) (62 different drugs)</b> |                                                                                                                                                      |
| Somnolence (8). Drugs involved (14)                                             | quetiapine (2), lorazepam (2), paracetamol, ibuprofen, clonazepam, lithium, lormetazepam, phenobarbital, diazepam, risperidone, chloral              |
| Depressed level of consciousness (6). Drugs involved (16)                       | quetiapine (4), lorazepam, diazepam, clonazepam, mirtazapine, lithium, haloperidol, fluoxetine, topiramate, methadone, clomethiazole, carbocisteine, |
| Coma (4). Drugs involved (10)                                                   | quetiapine (2), gabapentin, diazepam, lorazepam, lormetazepam, paliperidone, paroxetine, risperidone, tramadol                                       |
| Encephalopathy (4). Drugs involved (7)                                          | ertapenem (3), quetiapine, valproic acid, tacrolimus, meropenem                                                                                      |
| Ataxia (3). Drugs involved (3)                                                  | lorazepam, chloral hydrate, bupropion                                                                                                                |
| Cerebral hemorrhage (3). Drugs involved (3)                                     | acenocoumarol (2), rivaroxaban                                                                                                                       |
| Tremor (3). Drugs involved (6)                                                  | clonazepam, lithium, lormetazepam, phenobarbital, trazodone, bupropion                                                                               |
| Guillain-Barre syndrome (2). Drugs involved (4)                                 | measles, combinations with mumps and rubella, live attenuated; hepatitis A, inactivated, whole virus; raltitrexed, oxaliplatin                       |
| Neuropathy peripheral (2). Drugs involved (2)                                   | bortezomib, benznidazole                                                                                                                             |
| Seizure (2). Drugs involved (2)                                                 | fluoxetine, busulfan                                                                                                                                 |
| Serotonin syndrome (2). Drugs involved (6)                                      | mirtazapine (2), aripiprazole, quetiapine, sertraline, venlafaxine                                                                                   |
| Anticholinergic syndrome (1). Drugs involved (1)                                | glycopyrronium bromide                                                                                                                               |
| Aphasia (1). Drugs involved (2)                                                 | propofol, sevoflurane                                                                                                                                |
| Cerebral hematoma (1). Drugs involved (2)                                       | acetylsalicylic acid, edoxaban                                                                                                                       |
| Disorientation (1). Drugs involved (4)                                          | dexketoprofen, diclofenac, ibuprofen, naproxen                                                                                                       |
| Dyskinesia (1). Drugs involved (3)                                              | haloperidol, quetiapine, trazodone                                                                                                                   |
| Dystonia (1). Drugs involved (2)                                                | propofol, sevoflurane                                                                                                                                |
| Headache (1). Drugs involved (2)                                                | omeprazole, fosfomycin                                                                                                                               |
| Horner's syndrome (1). Drugs involved (1)                                       | bupivacaine                                                                                                                                          |
| Hyperreflexia (1). Drugs involved (4)                                           | clonazepam, phenobarbital, lithium, lormetazepam                                                                                                     |
| Idiopathic intracranial hypertension (1). Drugs involved (1)                    | tretinoin                                                                                                                                            |
| Leukoencephalopathy (1). Drugs involved (1)                                     | methotrexate                                                                                                                                         |
| Loss of consciousness (1). Drugs involved (1)                                   | antithymocyte immunoglobulin                                                                                                                         |
| Meningitis aseptic (1). Drugs involved (2)                                      | metamizole sodium, dexketoprofen                                                                                                                     |
| Mixed incontinence, urge and stress (1). Drugs involved (2)                     | quetiapine, risperidone                                                                                                                              |
| Myasthenia gravis (1). Drugs involved (1)                                       | alemtuzumab                                                                                                                                          |
| Myoclonus (1). Drugs involved (3)                                               | clonazepam, haloperidol, quetiapine                                                                                                                  |
| Paraesthesia (1). Drugs involved (2)                                            | omeprazole, fosfomycin                                                                                                                               |

|                                                                                          |                                                                                                                                                                                                                                                   |
|------------------------------------------------------------------------------------------|---------------------------------------------------------------------------------------------------------------------------------------------------------------------------------------------------------------------------------------------------|
| Progressive multifocal leukoencephalopathy (1).<br>Drugs involved (1)                    | natalizumab                                                                                                                                                                                                                                       |
| Status epilepticus (1). Drugs involved (1)                                               | ertapenem                                                                                                                                                                                                                                         |
| Subdural hematoma (1). Drugs involved (2)                                                | acenocoumarol, levofloxacin                                                                                                                                                                                                                       |
| Syncope (1). Drugs involved (1)                                                          | tramadol                                                                                                                                                                                                                                          |
| Thrombotic cerebral infarction (1). Drugs involved (1)                                   | norethisterone                                                                                                                                                                                                                                    |
| Transient ischemic attacks (1). Drugs involved (1)                                       | danazol                                                                                                                                                                                                                                           |
| Hypotonia (1). Drugs involved (2)                                                        | propofol, sevoflurane                                                                                                                                                                                                                             |
| <b>Metabolism and nutrition disorders (38). Drugs involved (72) (30 different drugs)</b> |                                                                                                                                                                                                                                                   |
| Lactic acidosis (11). Drugs involved (13)                                                | metformin (9), furosemide, ibuprofen, nitroprusside, salbutamol                                                                                                                                                                                   |
| Metabolic acidosis (6). Drugs involved (16)                                              | sulfamethoxazole and trimethoprim (5), tacrolimus (3), azithromycin (2), furosemide, methylprednisolone, piperacillin-tazobactam, ciclosporin, losartan, spironolactone                                                                           |
| Hyperkalemia (6). Drugs involved (17)                                                    | sulfamethoxazole and trimethoprim (3), ibuprofen, dexketoprofen, tacrolimus, furosemide, azithromycin, enalapril, piperacillin and beta-lactamase inhibitor, ciclosporin, naproxen, losartan, diclofenac, propranolol, flecainide, spironolactone |
| Hypomagnesaemia (3). Drugs involved (4)                                                  | omeprazole (3), metformin                                                                                                                                                                                                                         |
| Inappropriate antidiuretic hormone secretion (3).<br>Drugs involved (8)                  | quetiapine (2), lorazepam, haloperidol, carbamazepine, losartan and diuretics, zolpidem, citalopram                                                                                                                                               |
| Hyperlactacidemia (2). Drugs involved (2)                                                | salbutamol (2)                                                                                                                                                                                                                                    |
| Hyponatremia (2). Drugs involved (3)                                                     | omeprazole, losartan and diuretics, linezolid                                                                                                                                                                                                     |
| Hypercalcemia (2). Drugs involved (3)                                                    | calcifediol, calcitriol, calcium acetate                                                                                                                                                                                                          |
| Hypervitaminosis D (1). Drugs involved (1)                                               | calcifediol                                                                                                                                                                                                                                       |
| Mitochondrial toxicity (1). Drugs involved (2)                                           | propofol, sevoflurane                                                                                                                                                                                                                             |
| Hypoglycemia (1). Drugs involved (3)                                                     | methotrexate, pegaspargase, mercaptopurine                                                                                                                                                                                                        |
| <b>Gastrointestinal disorders (36). Drugs involved (52) (38 different drugs)</b>         |                                                                                                                                                                                                                                                   |
| Vomiting (9). Drugs involved (15)                                                        | paracetamol (3), ibuprofen, amiodarone, clonazepam, azithromycin, lithium, lormetazepam, phenobarbital, diazepam, carbocisteine, brivaracetam, amoxicillin, gadobutrol                                                                            |
| Diarrhea (5). Drugs involved (5)                                                         | amiodarone, mycophenolic acid, nivolumab, everolimus, duloxetine                                                                                                                                                                                  |
| Retroperitoneal hematoma (3). Drugs involved (6)                                         | acenocoumarol (2), omeprazole, rivaroxaban, allopurinol, sertraline                                                                                                                                                                               |
| Pancreatitis (3). Drugs involved (3)                                                     | pegaspargase (2), apixaban                                                                                                                                                                                                                        |
| Aphthous ulcer (2). Drugs involved (4)                                                   | paracetamol, ibuprofen, amoxicillin and beta-lactamase inhibitor, sorafenib                                                                                                                                                                       |
| Dyspepsia (2). Drugs involved (2)                                                        | azithromycin (2)                                                                                                                                                                                                                                  |
| Abdominal pain (1). Drugs involved (1)                                                   | mycophenolic acid                                                                                                                                                                                                                                 |
| Abdominal pain upper (1). Drugs involved (1)                                             | paracetamol                                                                                                                                                                                                                                       |

|                                                                                           |                                                                                                                                                                                                          |
|-------------------------------------------------------------------------------------------|----------------------------------------------------------------------------------------------------------------------------------------------------------------------------------------------------------|
| Enterocolitis hemorrhagic (1). Drugs involved (1)                                         | dasatinib                                                                                                                                                                                                |
| Gastrointestinal inflammation (1). Drugs involved (1)                                     | methotrexate                                                                                                                                                                                             |
| Ileus paralytic (1). Drugs involved (1)                                                   | bortezomib                                                                                                                                                                                               |
| Nausea (1). Drugs involved (1)                                                            | tramadol                                                                                                                                                                                                 |
| Neutropenic colitis (1). Drugs involved (2)                                               | cyclophosphamide, docetaxel                                                                                                                                                                              |
| Pancreatitis necrotising (1). Drugs involved (3)                                          | methotrexate, pegaspargase, mercaptopurine                                                                                                                                                               |
| Peptic ulcer perforation (1). Drugs involved (3)                                          | dexketoprofen, diclofenac, dexamethasone                                                                                                                                                                 |
| Upper gastrointestinal hemorrhage (1). Drugs involved (1)                                 | cabozantinib                                                                                                                                                                                             |
| Ulcerative gastritis (1). Drugs involved (1)                                              | nivolumab                                                                                                                                                                                                |
| Sprue-like enteropathy (1). Drugs involved (1)                                            | olmesartan medoxomil                                                                                                                                                                                     |
| <b>Hepatobiliary disorders (35). Drugs involved (69) (50 different drugs)</b>             |                                                                                                                                                                                                          |
| Hepatic cytolysis (17). Drugs involved (33)                                               | amoxicillin and beta-lactamase inhibitor (4), atorvastatin (2), meropenem (2), paracetamol (2), ticagrelor, methylprednisolone, ceftazidime, sulfamethoxazole and trimethoprim, ibuprofen,               |
| Hepatitis fulminant (7). Drugs involved (13)                                              | paracetamol (3), isoniazid (2), omeprazole, metamizole sodium, dexketoprofen, enoxaparin, nivolumab, pyrazinamide, ipilimumab, repaglinide                                                               |
| Hepatitis cholestatic (6). Drugs involved (15)                                            | atorvastatin (2), amoxicillin and beta-lactamase inhibitor, azathioprine, canagliflozin, clopidogrel, cloxacillin, dapagliflozin, enalapril, fluoxetine, metformin, mirtazapine, nifedipine, ranitidine, |
| Mixed liver injury (3). Drugs involved (5)                                                | ceftazidime, ciprofloxacin, losartan, ticagrelor, tobramycin                                                                                                                                             |
| Autoimmune hepatitis (1). Drugs involved (2)                                              | interferon beta-1a, methylprednisolone                                                                                                                                                                   |
| Hypertransaminasemia (1). Drugs involved (1)                                              | labetalol                                                                                                                                                                                                |
| <b>Blood and lymphatic system disorder (31). Drugs involved (59) (45 different drugs)</b> |                                                                                                                                                                                                          |
| Pancytopenia (6). Drugs involved (19)                                                     | metamizole sodium (3), methotrexate (3), teicoplanin, sulfamethoxazole and trimethoprim,                                                                                                                 |
| Agranulocytosis (5). Drugs involved (5)                                                   | ampicillin, docetaxel, metamizole sodium, paclitaxel, valganciclovir                                                                                                                                     |
| Eosinophilia (4). Drugs involved (7)                                                      | clindamycin (2), quetiapine, ertapenem, piperacillin and beta-lactamase inhibitor, ceftriaxone, allopurinol                                                                                              |
| Neutropenia (3). Drugs involved (5)                                                       | cefotaxime, dexamethasone, metamizole sodium, quetiapine, vancomycin                                                                                                                                     |
| Hemophagocytic lymphohistiocytosis (2). Drugs involved (2)                                | alemtuzumab, etanercept                                                                                                                                                                                  |
| Anemia megaloblastic (1). Drugs involved (5)                                              | sulfamethoxazole and trimethoprim, omeprazole, gabapentin, carbamazepine, pregabalin                                                                                                                     |
| Aplasia pure red cell (1). Drugs involved (1)                                             | azathioprine                                                                                                                                                                                             |
| Autoimmune hemolytic anemia (1). Drugs involved (2)                                       | sulfamethoxazole and trimethoprim, tacrolimus                                                                                                                                                            |
| Bicytopenia (1). Drugs involved (1)                                                       | ceftaroline fosamil                                                                                                                                                                                      |
| Lymphopenia (1). Drugs involved (1)                                                       | alemtuzumab                                                                                                                                                                                              |
| Thrombocytopenic purpura (1). Drugs involved (2)                                          | valproic acid, disulfiram                                                                                                                                                                                |
| Thrombocytopenia (1). Drugs involved (4)                                                  | rosuvastatin, rivaroxaban, teicoplanin, tigecycline                                                                                                                                                      |

|                                                                                                       |                                                                                                             |
|-------------------------------------------------------------------------------------------------------|-------------------------------------------------------------------------------------------------------------|
| Thrombotic microangiopathy (1). Drugs involved (3)                                                    | methylprednisolone, mycophenolic acid, tacrolimus                                                           |
| Disseminated intravascular coagulation (1). Drugs involved (2)                                        | tigecycline, enoxaparin                                                                                     |
| <b>Skin and subcutaneous tissue disorders (29). Drugs involved (39) (31 different drugs)</b>          |                                                                                                             |
| Urticaria (6). Drugs involved (6)                                                                     | methylprednisolone, acetylsalicylic acid, ciprofloxacin, cefazolin, nomegestrol and estradiol, erythromycin |
| Rash maculo-papular (4). Drugs involved (5)                                                           | cloxacillin, cefotaxime, iohexol, iomeprol,                                                                 |
| Rash pruritic (3). Drugs involved (5)                                                                 | clindamycin, codeine combinations excl. psycholeptics, metamizole sodium, eslicarbazepine,                  |
| Rash (3). Drugs involved (5)                                                                          | ceftriaxone, allopurinol, clindamycin, daratumumab, methotrexate                                            |
| Rash erythematous (2). Drugs involved (2)                                                             | cefazolin, pegaspargase                                                                                     |
| Erythema (2). Drugs involved (2)                                                                      | ceftriaxone, rasburicase                                                                                    |
| Angioedema (2). Drugs involved (4)                                                                    | paracetamol, ibuprofen, amoxicillin and beta-lactamase inhibitor, iohexol                                   |
| Erythema multiforme (1). Drugs involved (1)                                                           | amoxicillin                                                                                                 |
| Drug eruption (1). Drugs involved (3)                                                                 | amoxicillin and beta-lactamase inhibitor, paracetamol, ibuprofen                                            |
| Toxic skin eruption (1). Drugs involved (2)                                                           | trazodone, oxcarbazepine                                                                                    |
| Petechiae (1). Drugs involved (1)                                                                     | meningococcus B, multicomponent vaccine                                                                     |
| Stevens-Johnson syndrome (1). Drugs involved (1)                                                      | sulfamethoxazole and trimethoprim                                                                           |
| Pruritus (1). Drugs involved (1)                                                                      | metamizole sodium                                                                                           |
| Hyperhidrosis (1). Drugs involved (1)                                                                 | immunoglobulins, normal human                                                                               |
| <b>Respiratory, thoracic and mediastinal disorders (23). Drugs involved (33) (26 different drugs)</b> |                                                                                                             |
| Respiratory failure (5). Drugs involved (9)                                                           | quetiapine (2), lorazepam, lithium, fluoxetine, diazoxide, methadone, clomethiazole,                        |
| Acute interstitial pneumonitis (5). Drugs involved (5)                                                | amiodarone (3), daptomycin, methotrexate                                                                    |
| Pneumonitis (2). Drugs involved (3)                                                                   | valproic acid, disulfiram, chloroquine                                                                      |
| Apnea (2). Drugs involved (2)                                                                         | pneumococcus, purified polysaccharides antigen; antilymphocyte immunoglobulin                               |
| Respiratory arrest (2). Drugs involved (4)                                                            | clonazepam, haloperidol, quetiapine, albumin                                                                |
| Alveolar proteinosis (1). Drugs involved (2)                                                          | sirolimus, tacrolimus                                                                                       |
| Hypersensitivity pneumonitis (1). Drugs involved (3)                                                  | sulfamethoxazole and trimethoprim, captopril, daptomycin                                                    |
| Respiratory depression (1). Drugs involved (1)                                                        | midazolam                                                                                                   |
| Throat irritation (1). Drugs involved (1)                                                             | daratumumab                                                                                                 |
| Hemoptysis (1). Drugs involved (1)                                                                    | rivaroxaban                                                                                                 |
| Laryngeal oedema (1). Drugs involved (1)                                                              | captopril                                                                                                   |
| Cough (1). Drugs involved (1)                                                                         | enalapril                                                                                                   |
| <b>Vascular disorders (22). Drugs involved (39) (33 different drugs)</b>                              |                                                                                                             |
| Abdominal wall hematoma (4). Drugs involved (9)                                                       | acenocoumarol (3), omeprazole, furosemide, enoxaparin, paroxetine, simvastatin, deflazacort                 |
| Pulmonary embolism (4). Drugs involved (5)                                                            | dienogest and ethinylestradiol, estradiol, etonorgestrel, olanzapine, progesterone                          |
| Hypotension (3). Drugs involved (3)                                                                   | metamizole sodium, tizanidine, immunoglobulins, normal human                                                |

|                                                                                   |                                                                                                                                                                                                                                                                                                                                                                              |
|-----------------------------------------------------------------------------------|------------------------------------------------------------------------------------------------------------------------------------------------------------------------------------------------------------------------------------------------------------------------------------------------------------------------------------------------------------------------------|
| Hypertension (3). Drugs involved (5)                                              | methylprednisolone, tacrolimus, mycophenolic acid, levonorgestrel, atorvastatin and ezetimibe                                                                                                                                                                                                                                                                                |
| Cutaneous vasculitis (2). Drugs involved (4)                                      | metamizole sodium, dexketoprofen, ceftriaxone, ampicillin                                                                                                                                                                                                                                                                                                                    |
| Hematoma muscle (2). Drugs involved (3)                                           | acenocoumarol, atorvastatin, pantoprazole                                                                                                                                                                                                                                                                                                                                    |
| Distributive shock (1). Drugs involved (6)                                        | furosemide, enalapril, diazoxide, bisoprolol, tocilizumab, hydrochlorothiazide                                                                                                                                                                                                                                                                                               |
| Hemarthrosis (1). Drugs involved (2)                                              | apixaban, sertraline                                                                                                                                                                                                                                                                                                                                                         |
| Re-opening of ductus arteriosus (1). Drugs involved (1)                           | diazoxide                                                                                                                                                                                                                                                                                                                                                                    |
| Transverse sinus thrombosis (1). Drugs involved (1)                               | pegaspargase                                                                                                                                                                                                                                                                                                                                                                 |
| <b>Renal and urinary disorders (19). Drugs involved (40) (20 different drugs)</b> |                                                                                                                                                                                                                                                                                                                                                                              |
| Acute kidney injury (15). Drugs involved (33)                                     | methotrexate (4), sulfamethoxazole and trimethoprim (2), ibuprofen (2), omeprazole (2), piperacillin and beta-lactamase inhibitor (2), ciclosporin (2), metformin, metamizole sodium, methylprednisolone, dexketoprofen, tacrolimus, furosemide, azithromycin, enalapril, paclitaxel, mycophenolic acid, losartan, cyclophosphamide, tizanidine, prednisone, spironolactone, |
| Renal tubular necrosis (1). Drugs involved (4)                                    | ibuprofen, dexketoprofen, naproxen, diclofenac                                                                                                                                                                                                                                                                                                                               |
| Renal tubular disorder (1). Drugs involved (1)                                    | ibuprofen                                                                                                                                                                                                                                                                                                                                                                    |
| Immune-mediated nephritis (1). Drugs involved (1)                                 | ibuprofen                                                                                                                                                                                                                                                                                                                                                                    |
| Renal hemorrhage (1). Drugs involved (1)                                          | acenocoumarol                                                                                                                                                                                                                                                                                                                                                                |
| <b>Immune system disorders (18). Drugs involved (22) (20 different drugs)</b>     |                                                                                                                                                                                                                                                                                                                                                                              |
| Anaphylactic shock (11). Drugs involved (13)                                      | amoxicillin and beta-lactamase inhibitor (2), metamizole sodium, methylprednisolone, amiodarone, paclitaxel, midazolam, iohexol, levofloxacin, carboplatin, morphine, iodixanol,                                                                                                                                                                                             |
| Drug reaction with eosinophilia (5). Drugs involved (6)                           | sulfamethoxazole and trimethoprim, furosemide, lamotrigine, carbamazepine, allopurinol,                                                                                                                                                                                                                                                                                      |
| Hypogammaglobulinemia (1). Drugs involved (2)                                     | carbamazepine, natalizumab                                                                                                                                                                                                                                                                                                                                                   |
| Cytokine release syndrome (1). Drugs involved (1)                                 | iron, parenteral preparations                                                                                                                                                                                                                                                                                                                                                |
| <b>Cardiac disorders (13). Drugs involved (25) (23 different drugs)</b>           |                                                                                                                                                                                                                                                                                                                                                                              |
| Atrioventricular block (4). Drugs involved (9)                                    | sulfamethoxazole and trimethoprim, clonazepam, valproic acid, enalapril, propofol, ticagrelor, propranolol, flecainide, bisoprolol                                                                                                                                                                                                                                           |
| Bradycardia (3). Drugs involved (5)                                               | pneumococcus, purified polysaccharides antigen, midazolam, antilymphocyte immunoglobulin, lacosamide, fentanyl                                                                                                                                                                                                                                                               |
| Ventricular tachycardia (2). Drugs involved (6)                                   | omeprazole, metformin, amiodarone, valsartan and sacubitril, eplerenone, tiotropium bromide                                                                                                                                                                                                                                                                                  |
| Tachycardia (1). Drugs involved (2)                                               | propranolol, flecainide                                                                                                                                                                                                                                                                                                                                                      |
| Pericarditis (1). Drugs involved (1)                                              | ulipristal                                                                                                                                                                                                                                                                                                                                                                   |
| Myocarditis (1). Drugs involved (1)                                               | prednisone                                                                                                                                                                                                                                                                                                                                                                   |
| Prinzmetal angina (1). Drugs involved (1)                                         | capecitabine                                                                                                                                                                                                                                                                                                                                                                 |
| <b>Investigations (5). Drugs involved (11) (8 different drugs)</b>                |                                                                                                                                                                                                                                                                                                                                                                              |

|                                                                                                                        |                                                                                           |
|------------------------------------------------------------------------------------------------------------------------|-------------------------------------------------------------------------------------------|
| International normalized ratio increased (1). Drugs involved (5)                                                       | amoxicillin and beta-lactamase inhibitor, acenocoumarol, methylprednisolone, mirtazapine, |
| Coagulation test abnormal (1). Drugs involved (2)                                                                      | tigecycline, enoxaparin                                                                   |
| Blood fibrinogen decreased (1). Drugs involved (2)                                                                     | tigecycline, enoxaparin                                                                   |
| Electrocardiogram QT prolonged (1). Drugs involved (1)                                                                 | amiodarone                                                                                |
| Blood bilirubin increased (1). Drugs involved (1)                                                                      | amoxicillin and beta-lactamase inhibitor                                                  |
| <b>Psychiatric disorders (8). Drugs involved (10) (6 different drugs)</b>                                              |                                                                                           |
| Confusional state (4). Drugs involved (5)                                                                              | ertapenem (2), quetiapine, tapentadol, cefepime                                           |
| Suicide attempt (1). Drugs involved (1)                                                                                | emtricitabine and tenofovir alafenamide and elvitegravir and cobicistat                   |
| Hallucinations (1). Drugs involved (2)                                                                                 | quetiapine, tapentadol                                                                    |
| Disorientation (1). Drugs involved (1)                                                                                 | lorazepam                                                                                 |
| Irritability (1). Drugs involved (1)                                                                                   | lorazepam                                                                                 |
| <b>Infections and infestations (6). Drugs involved (11) (11 different drugs)</b>                                       |                                                                                           |
| Pneumocystis jirovecii pneumonia (1). Drugs involved (3)                                                               | methotrexate, ciclosporin, prednisone                                                     |
| Disseminated tuberculosis (1). Drugs involved (2)                                                                      | azathioprine, infliximab                                                                  |
| Sepsis (1). Drugs involved (1)                                                                                         | pneumococcus, purified polysaccharides antigen                                            |
| Balanitis candida (1). Drugs involved (1)                                                                              | dapagliflozin                                                                             |
| Meningitis listeria (1). Drugs involved (1)                                                                            | alemtuzumab                                                                               |
| Gastroenteritis rotavirus (1). Drugs involved (3)                                                                      | methylprednisolone, vincristine, daunorubicin                                             |
| <b>General disorders and administration site conditions (4). Drugs involved (6) (6 different drugs)</b>                |                                                                                           |
| Oedema peripheral (2). Drugs involved (4)                                                                              | tacrolimus, diazoxide, sirolimus, olmesartan                                              |
| Generalized oedema (1). Drugs involved (1)                                                                             | levonorgestrel                                                                            |
| Pyrexia (1). Drugs involved (1)                                                                                        | meningococcus B, multicomponent vaccine                                                   |
| <b>Congenital, familial and genetic disorders (4). Drugs involved (8) (4 different drugs)</b>                          |                                                                                           |
| Neural tube defect (1). Drugs involved (3)                                                                             | valproic acid, phenobarbital, levetiracetam                                               |
| Hypoplastic left heart syndrome (1). Drugs involved (1)                                                                | lamotrigine                                                                               |
| Arnold-Chiari malformation (1). Drugs involved (2)                                                                     | valproic acid, lamotrigine                                                                |
| Meningomyelocele (1). Drugs involved (2)                                                                               | valproic acid, lamotrigine                                                                |
| <b>Musculoskeletal and connective tissue disorders (4). Drugs involved (4) (2 different drugs)</b>                     |                                                                                           |
| Immune-mediated myositis (3). Drugs involved (3)                                                                       | atorvastatin (3)                                                                          |
| Muscular weakness (1). Drugs involved (1)                                                                              | zoledronic acid                                                                           |
| <b>Eye disorders (2). Drugs involved (2) (2 different drugs)</b>                                                       |                                                                                           |
| Photopsia (1). Drugs involved (1)                                                                                      | ivabradine                                                                                |
| Diplopia (1). Drugs involved (1)                                                                                       | topiramate                                                                                |
| <b>Injury, poisoning and procedural complications (1). Drugs involved (1)</b>                                          |                                                                                           |
| Infusion related reaction (1). Drugs involved (1)                                                                      | amiodarone                                                                                |
| <b>Neoplasms benign, malignant and unspecified (incl. cyst and polyps) (1). Drugs involved (3) (3 different drugs)</b> |                                                                                           |
| Leukemia (1). Drugs involved (3)                                                                                       | paclitaxel, carboplatin, radiotherapy                                                     |
| <b>Pregnancy, puerperium and perinatal conditions (1). Drugs involved (5) (5 different drugs)</b>                      |                                                                                           |
| Oligohydramnios (1). Drugs involved (5)                                                                                | cyclophosphamide, doxorubicin, paclitaxel, pertuzumab, trastuzumab                        |

**Table S2. Most frequently reported adverse drug reactions by organ class system.**

| <b>System organ class (SOC) disorders</b>                            | <b>Total ADR</b> |
|----------------------------------------------------------------------|------------------|
| Nervous system disorders                                             | 63 (17.4)        |
| Metabolism and nutrition disorders                                   | 38 (10.5)        |
| Gastrointestinal disorders                                           | 36 (9.9)         |
| Hepatobiliary disorders                                              | 35 (9.6)         |
| Blood and lymphatic system disorders                                 | 31 (8.5)         |
| Skin and subcutaneous tissue disorders                               | 29 (8.0)         |
| Respiratory, thoracic and mediastinal disorders                      | 23 (6.3)         |
| Vascular disorders disorders                                         | 22 (6.1)         |
| Renal and urinary disorders                                          | 19 (5.2)         |
| Immune system disorders                                              | 18 (5.0)         |
| Cardiac disorders                                                    | 13 (3.6)         |
| Psychiatric disorders                                                | 8 (2.2)          |
| Infections and infestations                                          | 6 (1.7)          |
| Investigations                                                       | 5 (1.4)          |
| General disorders and administration site conditions                 | 4 (1.1)          |
| Congenital, familial and genetic disorders                           | 4 (1.1)          |
| Musculoskeletal and connective tissue disorders                      | 4 (1.1)          |
| Eye disorders                                                        | 2 (0.6)          |
| Injury, poisoning and procedural complications                       | 1 (0.3)          |
| Pregnancy, puerperium and perinatal conditions                       | 1 (0.3)          |
| Neoplasms benign, malignant and unspecified (incl. cysts and polyps) | 1 (0.3)          |
| <b>Total</b>                                                         | <b>363 (100)</b> |

\*More than one adverse drug reaction could be notified in each report of suspected adverse drug reactions.

**Table S3. Most frequently adverse drug reactions.**

| <b>Adverse drug reaction (Preferred Term)</b> | <b>n</b> | <b>%</b> |
|-----------------------------------------------|----------|----------|
| Hepatic cytolysis                             | 17       | 4.7      |
| Acute kidney injury                           | 15       | 4.1      |
| Anaphylactic shock                            | 11       | 3        |
| Lactic acidosis                               | 11       | 3        |
| Vomiting                                      | 9        | 2.5      |
| Somnolence                                    | 8        | 2.2      |
| Hepatitis fulminant                           | 7        | 1.9      |
| Depressed level of consciousness              | 6        | 1.7      |
| Hepatitis cholestatic                         | 6        | 1.7      |
| Hyperkalaemia                                 | 6        | 1.7      |
| Metabolic acidosis                            | 6        | 1.7      |
| Pancytopenia                                  | 6        | 1.7      |
| Urticaria                                     | 6        | 1.7      |
| Acute interstitial pneumonitis                | 5        | 1.4      |
| Agranulocytosis                               | 5        | 1.4      |
| Diarrhoea                                     | 5        | 1.4      |
| Drug reaction with eosinophilia and systemic  | 5        | 1.4      |
| Respiratory failure                           | 5        | 1.4      |
| Others                                        | 224      | 61.7     |
| Total                                         | 363      | 100      |

\*More than one adverse drug reaction could be notified in each report of suspected adverse drug reactions.



**Table S4. Most frequently drugs involved in the adverse drug reactions by ATC subgroup.**

| <b>Therapeutic subgroup</b>                             | <b>n</b> | <b>%</b> |
|---------------------------------------------------------|----------|----------|
| Antibacterials for systemic use (J01)                   | 70       | 14.4     |
| Psycholeptics (N05)                                     | 46       | 9.4      |
| Antineoplastic agents (L01)                             | 44       | 9.0      |
| Immunosuppressants (L04)                                | 38       | 7.9      |
| Antiepileptics (N03)                                    | 31       | 6.4      |
| Antithrombotic agents (B01)                             | 30       | 6.2      |
| Analgesics (N02)                                        | 26       | 5.4      |
| Antidepressants (N06)                                   | 24       | 4.8      |
| Antiinflammatory and antirheumatic products (M01)       | 17       | 3.5      |
| Drugs used in diabetes (A10)                            | 15       | 3.1      |
| Drugs for acid related disorders (A02)                  | 14       | 2.9      |
| Agents acting on the renin-angiotensin system (C09)     | 13       | 2.7      |
| Corticosteroids for systemic use (H02)                  | 13       | 2.7      |
| Lipid modifying agents (C10)                            | 12       | 2.5      |
| Cardiac therapy (C01)                                   | 10       | 2.1      |
| Diuretics (C03)                                         | 9        | 1.9      |
| Sex hormones and modulators of the genital system (G03) | 9        | 1.9      |
| Antimycobacterials (J04)                                | 6        | 1.2      |
| Contrast media (V08)                                    | 6        | 1.2      |
| Beta blocking agents (C07)                              | 5        | 1.0      |
| All other therapeutic products (V03)                    | 5        | 1.0      |
| Others                                                  | 44       | 8.8      |
| Total                                                   | 487*     | 100      |

\*A total of 207 different drugs were involved in the adverse drugs reactions but a drug could be involved in more than one adverse drug reaction.

**Table S5. Most frequently drugs involved in adverse drug reactions.**

| <b>Drug</b>                              | <b>n</b> | <b>%</b> |
|------------------------------------------|----------|----------|
| quetiapine                               | 17       | 3.5      |
| sulfamethoxazole and trimethoprim        | 13       | 2.7      |
| acenocoumarol                            | 12       | 2.5      |
| metamizole sodium                        | 11       | 2.3      |
| metformin                                | 11       | 2.3      |
| methotrexate                             | 11       | 2.3      |
| omeprazole                               | 11       | 2.3      |
| amoxicillin and beta-lactamase inhibitor | 10       | 2.1      |
| paracetamol                              | 10       | 2.1      |
| amiodarone                               | 8        | 1.6      |
| atorvastatin                             | 8        | 1.6      |
| methylprednisolone                       | 8        | 1.6      |
| tacrolimus                               | 8        | 1.6      |
| ibuprofen                                | 7        | 1.4      |
| pegaspargase                             | 7        | 1.4      |
| dexketoprofen                            | 6        | 1.2      |
| ertapenem                                | 6        | 1.2      |
| furosemide                               | 6        | 1.2      |
| mirtazapine                              | 6        | 1.2      |
| valproic acid                            | 5        | 1        |
| lorazepam                                | 5        | 1        |
| Others                                   | 301      | 61.8     |
| Total                                    | 487*     | 100      |

\*A total of 207 different drugs were involved in the adverse drug reactions but a drug could be involved in more than one adverse drug reaction.
